# Supplementary material for: Isolation and Identification of Plant-Growth Inhibitory Constituents from Polygonum chinense Linn and Evaluation of Their Bioherbicidal Potential
Source: MDPI journal article supplement (doi:10.3390/plants12071577), 2023-04-06
Supplement: s1 [file s1]

## Supplementary

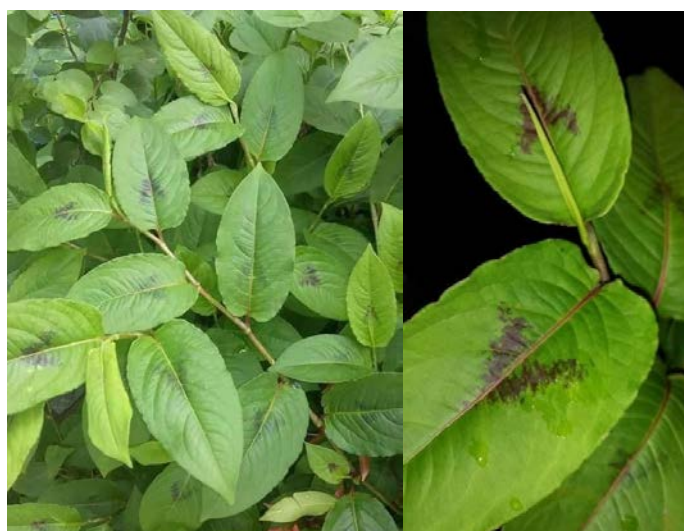

**Figure S1.** *Polygonum chinense* (Source: the photos were taken by Thang Lam Lun (in July 2020) near Mandalay division, Myanmar)

Table S1: Mean values of *Polygonum chinense* plant extracts on the hypocotyls/ coleoptiles length of four test plant species at different extract concentrations after 48 h treatments.

| Concentrations<br>(mg dry weight<br>equivalent/mL) | Test Plants (% of Hypocotyls/ coleoptiles) |          |          |                |
|----------------------------------------------------|--------------------------------------------|----------|----------|----------------|
|                                                    | Cress                                      | Lettuce  | Timothy  | Barnyard grass |
| Control                                            | 100                                        | 100      | 100      | 100            |
| 1                                                  | 96.41                                      | 81.58*** | 80.00*** | 94.40          |
| 3                                                  | 64.67***                                   | 67.11*** | 78.82*** | 85.81***       |
| 10                                                 | 30.54***                                   | 43.42*** | 40.00*** | 84.38***       |
| 30                                                 | 0.00***                                    | 31.58*** | 14.12*** | 61.33***       |
| 100                                                | 0.00***                                    | 0.00***  | 1.96***  | 12.50***       |
| 300                                                | 0.00***                                    | 0.00***  | 0.00***  | 0.91***        |

Asterisks represent a statistically significant difference between treatment and control: \*\*\* $p < 0.001$  (one-way ANOVA, post hoc by Tukey's test)

Table S2: Mean values of *Polygonum chinense* plant extracts on the root length of four test plant species at different extract concentrations after 48 h treatments.

| Concentrations<br>(mg dry<br>weight<br>equivalent/mL) | Test Plants (% of Root) |          |          |                |
|-------------------------------------------------------|-------------------------|----------|----------|----------------|
|                                                       | Cress                   | Lettuce  | Timothy  | Barnyard grass |
| Control                                               | 100                     | 100      | 100      | 100            |
| 1                                                     | 113.96                  | 74.44*** | 53.27*** | 81.77***       |
| 3                                                     | 46.00***                | 39.01*** | 42.48*** | 74.06***       |
| 10                                                    | 16.02***                | 25.11*** | 16.67*** | 70.94***       |
| 30                                                    | 4.58***                 | 14.35*** | 1.31***  | 16.26***       |
| 100                                                   | 0.00***                 | 5.83***  | 1.63***  | 0.00***        |
| 300                                                   | 0.00***                 | 0.00***  | 0.00***  | 0.00***        |

Asterisks represent a statistically significant difference between treatment and control: \*\*\* $p < 0.001$  (one-way ANOVA, post hoc by Tukey's test)
